# Supplementary material
Source: PubMed Central journal article supplement (PMC5541905)

Bitler et al. Supplementary Figure 9

Figure 1

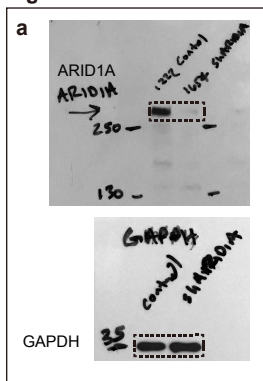

Figure 1

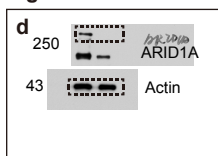

Figure 2

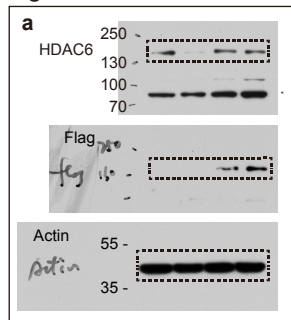

Figure 2

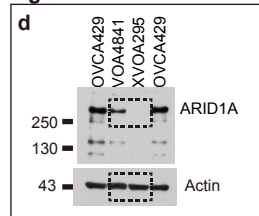

Figure 3

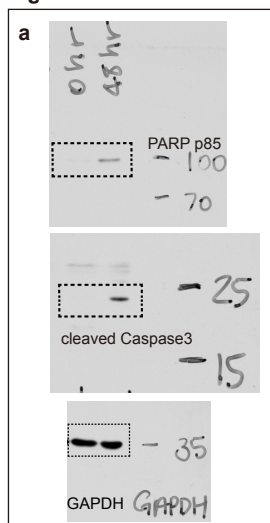

Figure 2

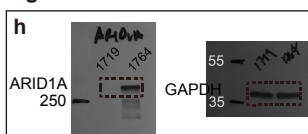

Figure 3

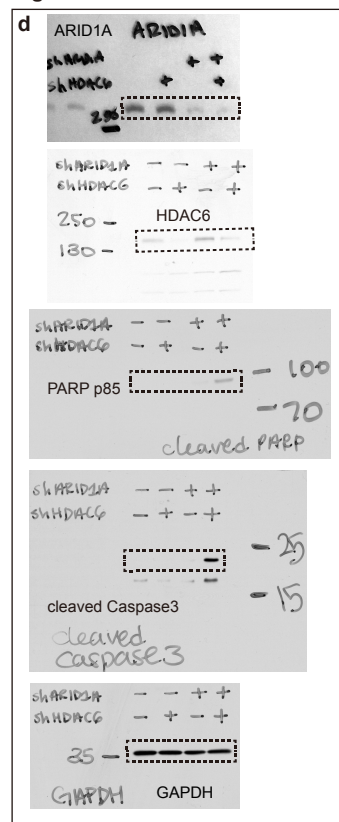

Figure 3

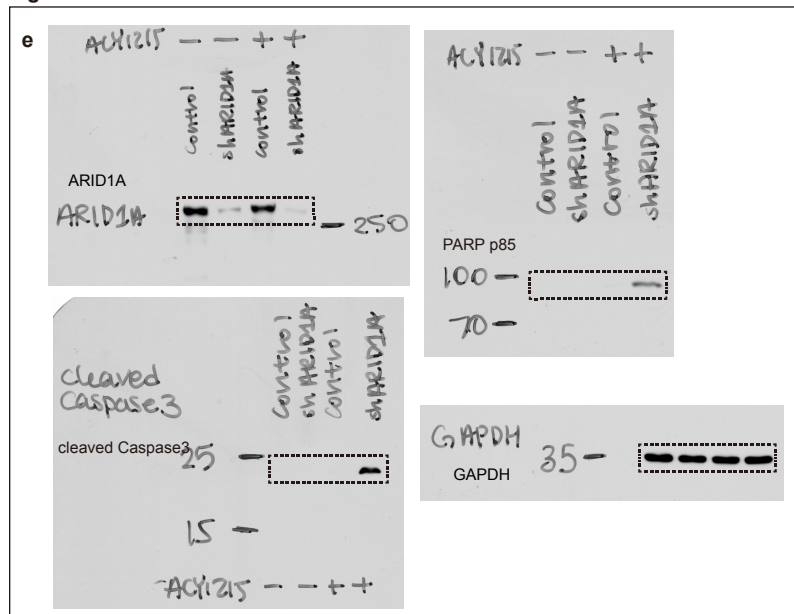

Figure 3

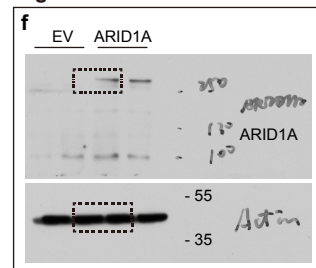

**Figure 4**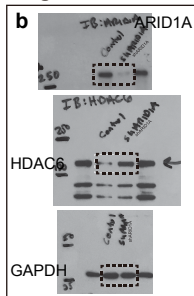**Figure 4**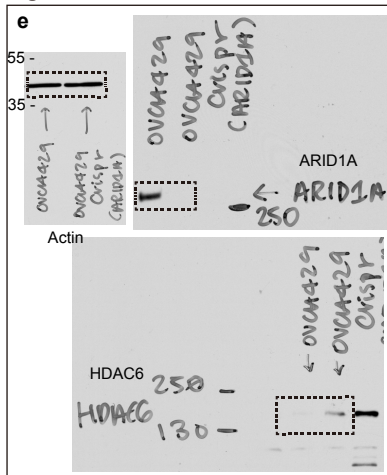**Figure 4**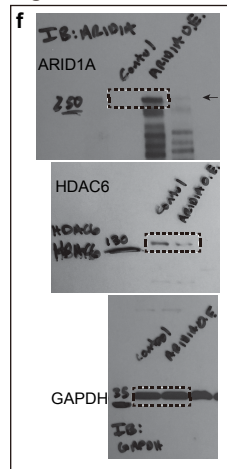**Figure 5**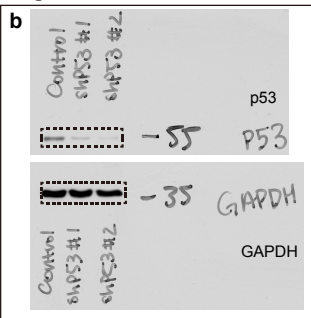**Figure 5**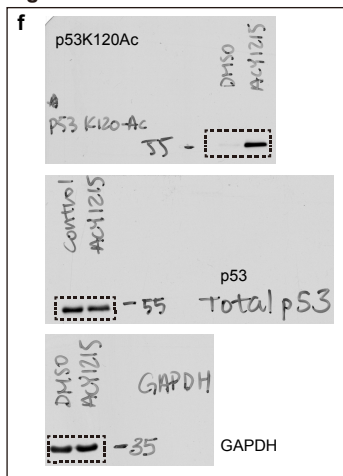**Figure 5**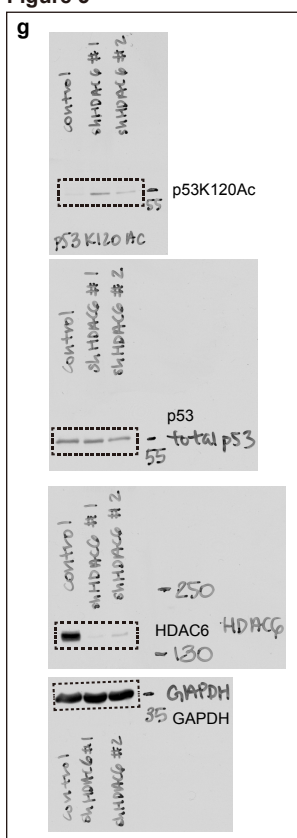**Fig. 6**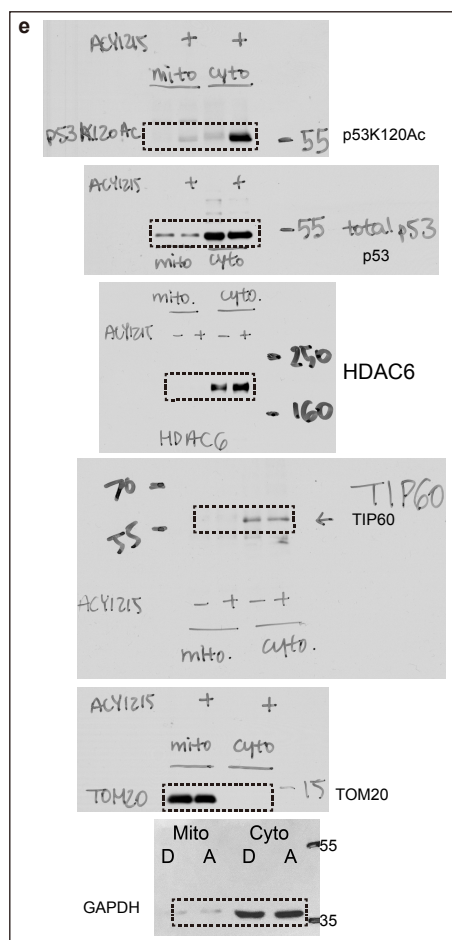**Figure 5**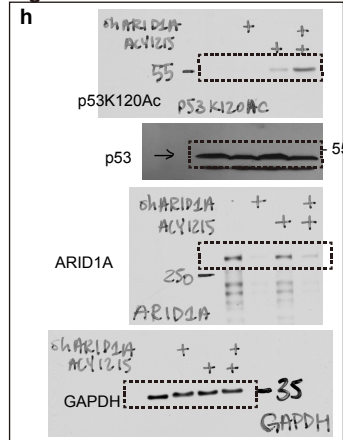

**Fig. 7**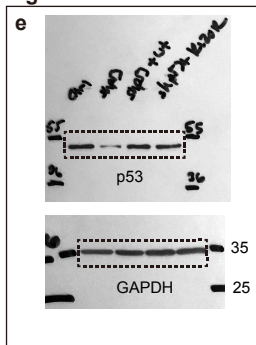**Suppl. fig.1d**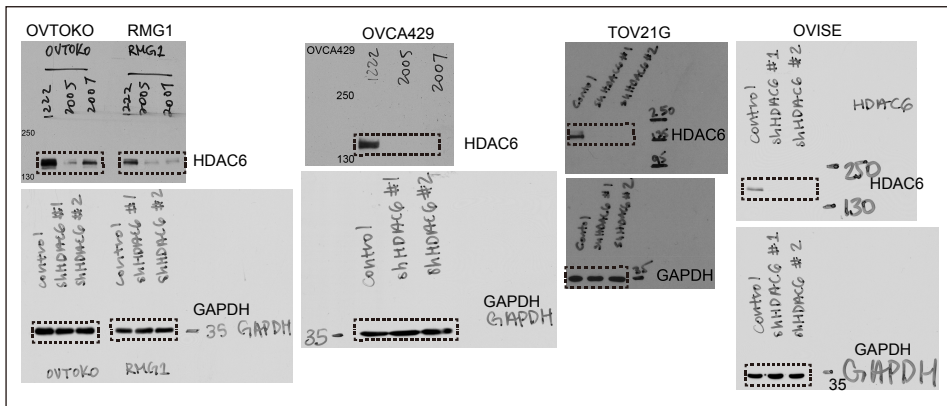**Suppl. fig.2a**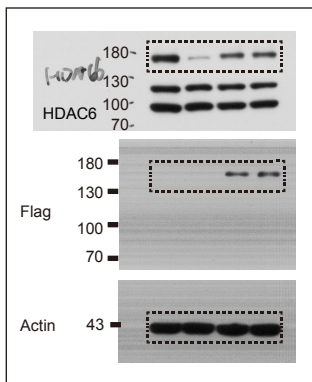**Suppl. fig.2d**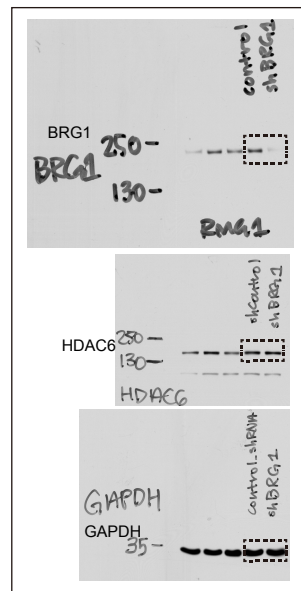**Suppl. fig.2g**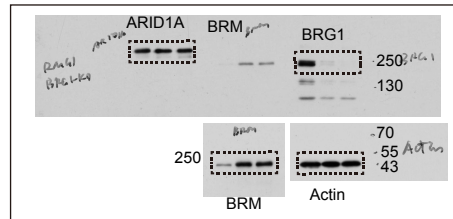**Suppl. fig.4a**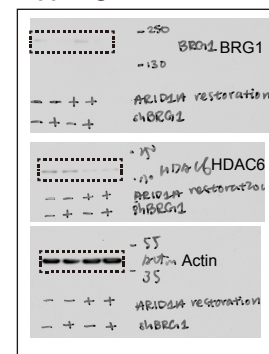**Suppl. fig.5b**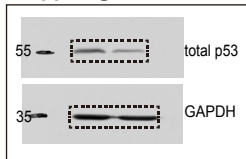**Suppl. fig.5e**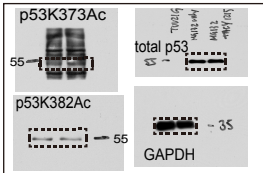**Suppl. fig.6b**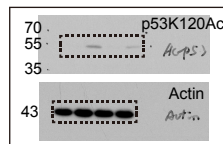

Supplement: NIHMS887916-supplement-10.pdf [file NIHMS887916-supplement-10.pdf]
